# Supplementary material for: Nattokinase, a Subtilisin-like Alkaline-Serine Protease, Reduces Mutacin Activity by Inactivating the Competence-Stimulating Peptide in Streptococcus mutans
Source: MDPI journal article supplement (doi:10.3390/pathogens13040286), 2024-03-27
Supplement: s1 [file s1]

## Supplementary Materials

Table S1. Oligonucleotide primers used in this study and the amplicon size.

| Primer                     | Sequence (5'→3')       | Amplicon           | Length (bp) | Accession No. | Reference  |
|----------------------------|------------------------|--------------------|-------------|---------------|------------|
| Bacteriocin Identification |                        |                    |             |               |            |
| mutI-F                     | GAAGTCCTTGGTACTGAAAC   | mutA (mutacinI)    | 142         | AF238860      | This study |
| mutI-R                     | ACCCCTGTACATCCTAATGAAC |                    |             |               |            |
| mutII-F                    | GAACAAGTTAAACAGTAACGC  | mutA (mutacin II)  | 136         | U40620        | This study |
| mutII-R                    | GCCATGAATTCATGCGACAC   |                    |             |               |            |
| mutIII-F                   | TTATTAGAAGTCCTTGGTAC   | mutA' (mutacinIII) | 151         | AF238860.1    | This study |
| mutIII-R                   | GAGATCTTTCGAGGAGGGC    |                    |             |               |            |
| mukA-F                     | AAGGAAGATACAACAACACTAC | mukAI-A3           | 544         | EF060238.1    | This study |
| mukA-R                     | CATGAGTTGTAACGGCATTC   |                    |             |               |            |
| smbA-F                     | TATGGTAACGCTCATCAAAG   | smbAB              | 331         | AB179778      | This study |
| smbB-R                     | TGCATTCAACAGTAACCGTAC  |                    |             |               |            |
| mutacinIV F(nlmA)          | TGGATACACAGGCATTTGAAC  | nlmAB              | 440         | AE014133      | This study |
| mutacinIV R(nlmB)          | GGAAAACTACAGATCCAAC    |                    |             |               |            |
| mutV-F                     | GAATACACAAGCATTTGAAC   | nlmC               | 227         | AE014133      | This study |
| mutV-R                     | TAACCACAGGAATTAAGAGC   |                    |             |               |            |
| mutVI-F                    | GAATACACAAGCATTTGAAC   | nlmD               | 227         | AE014133      | This study |
| mutVI-R                    | TCAACAAAAAGTAGCAGCAC   |                    |             |               |            |
| Quantitavite real-time PCR |                        |                    |             |               |            |
| nlmA F-RT                  | TGGATACACAGGCATTTGAAC  | nlmA               | 109         | AE014133      | This study |
| nlmA R-RT                  | CATATTCCAATTGCCGCGAC   |                    |             |               |            |
| nlmB F-RT                  | GCTGATACGTTTCTTTCAGC   | nlmB               | 130         | AE014133      | This study |
| nlmB R-RT                  | GGAAAACTACAGATCCAAC    |                    |             |               |            |
| nlmC F-RT                  | GAATACACAAGCATTTGAAC   | nlmC               | 88          | AE014133      | This study |
| nlmC R-RT                  | GCACCTAGAGCAATACCTGC   |                    |             |               |            |
| nlmD F-RT                  | GAATACACAAGCATTTGAAC   | nlmD               | 157         | AE014133      | This study |
| nlmD R-RT                  | GACTGGGAGAGTAAGTGTAC   |                    |             |               |            |
| 16S F-RT                   | TGCCGAAGATTCCCTACTGC   | 16S rRNA           | 111         | AE014133      | This study |
| 16S R-RT                   | AAGAGCTTACCAAGGCGACG   |                    |             |               |            |

Construction of mutant

|         |                                     |      |     |          |            |
|---------|-------------------------------------|------|-----|----------|------------|
| comCu-F | ccccgaattcACAGGAATTAAGAGCTCCTCC     | comC | 564 | AE014133 | This study |
| comCu-R | ccccggtaccCGCCAATGATAATCTCTAATTCATC |      |     |          |            |
| comCd-F | ccccaagcttCAACATTTTTCCGGCTGTTTAAC   | comC | 522 | AE014133 | This study |
| comCd-R | ccctctagaACTGCCTGAGATGGAGTTGC       |      |     |          |            |

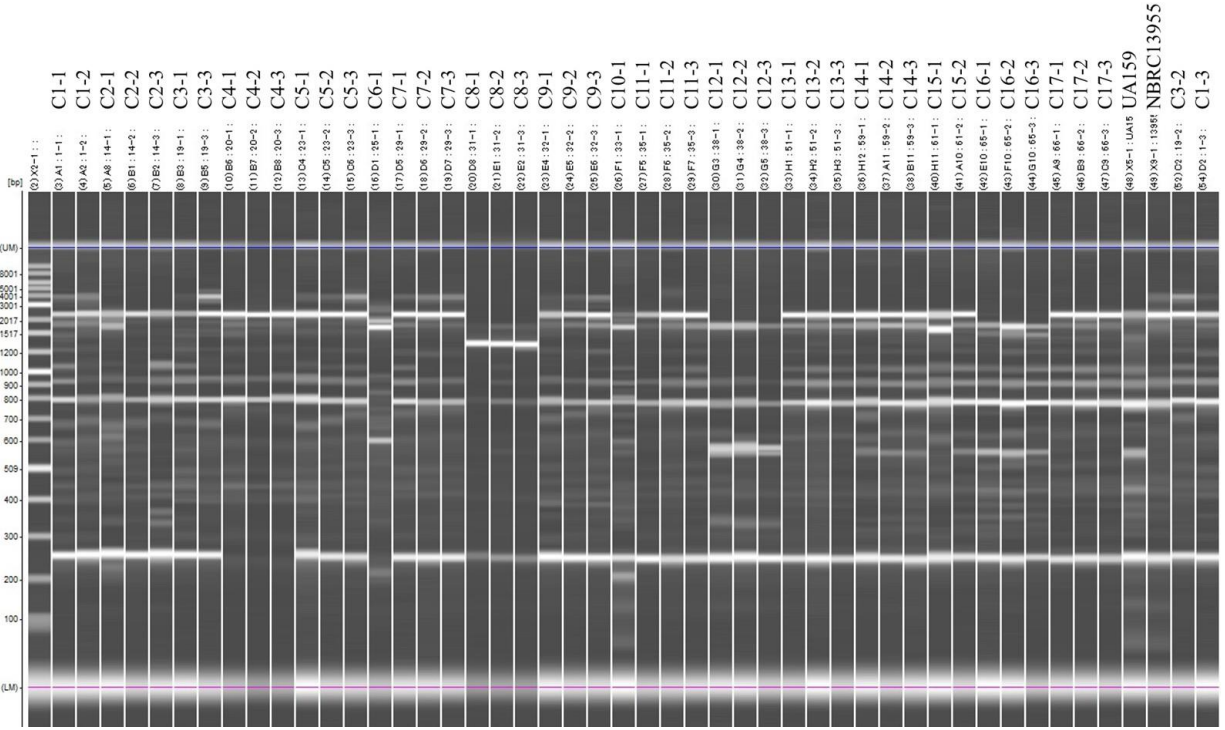

Figure S1. Electrophoresis of AP-PCR analysis.

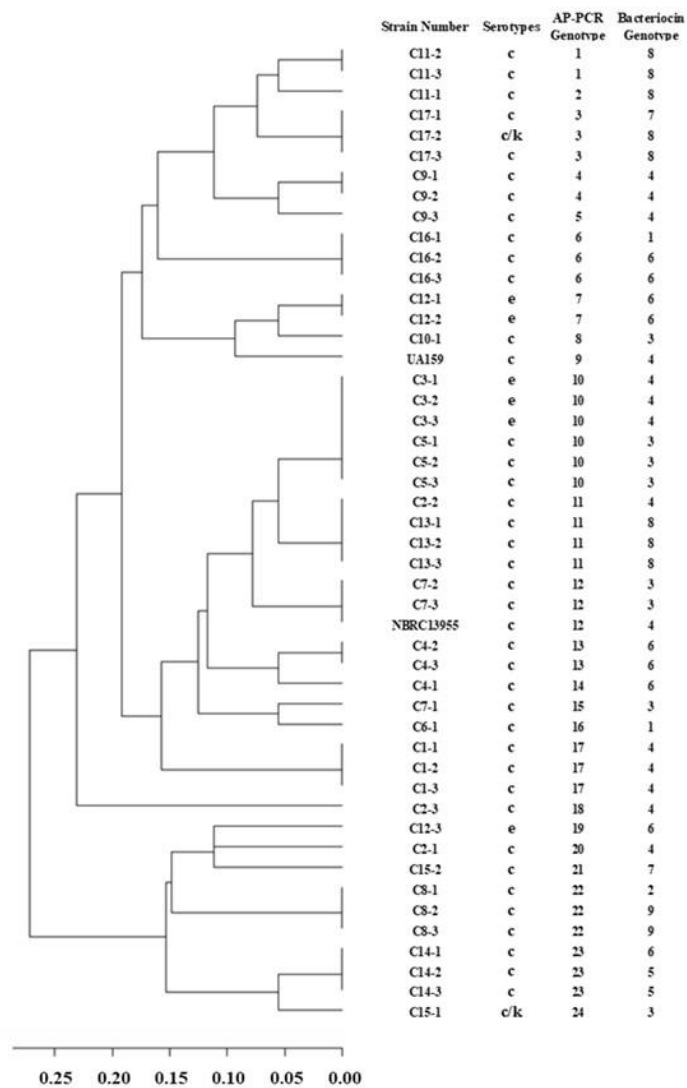

Figure S2. Phylogenetic trees based on AP-PCR analysis and mutacin genotype.

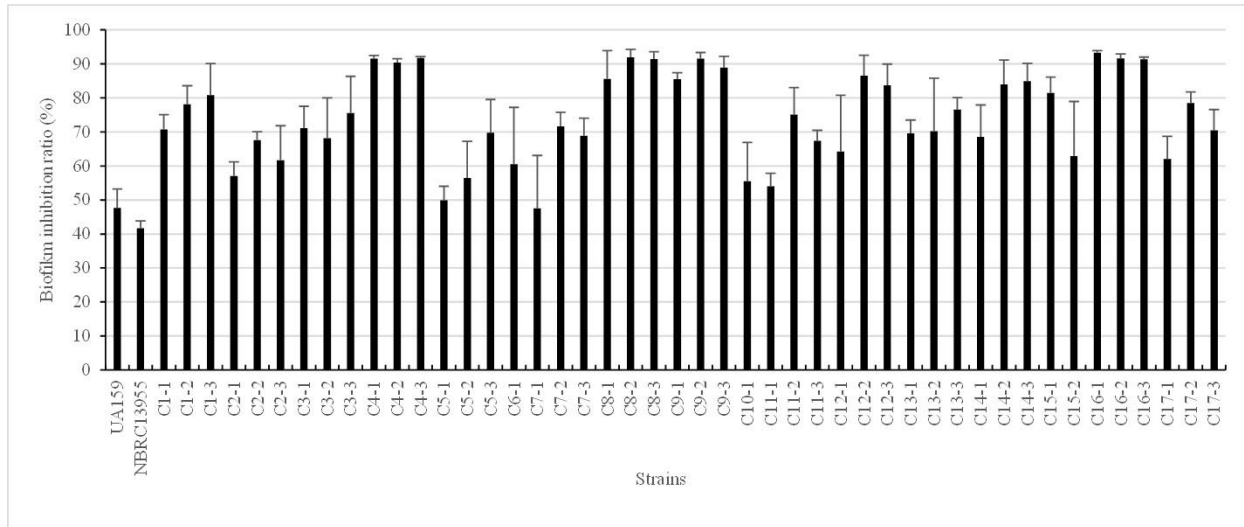

Figure S3. Effect of nattokinase on *S. mutans* biofilm formation.

Human saliva was used to assess biofilm volume on the saliva-coated surfaces. The pooled normal saliva collected from  $\geq 3$  donors (Cosmo Bio Co. Ltd., Tokyo, Japan) was clarified via centrifugation at  $4,000 \times g$  and  $4^\circ\text{C}$  for 10 min. The supernatant was then filtered through a  $0.22\ \mu\text{m}$  pore filter and frozen at  $-20^\circ\text{C}$  until use. Aliquots ( $20\ \mu\text{L}$ ) of clarified saliva were added to 96-well polystyrene microtiter plates (Sumitomo Bakelite, Tokyo, Japan) and incubated at  $4^\circ\text{C}$  for 20 h. The saliva was then decanted, and the wells were washed twice with phosphate-buffered saline (pH 7.4). Bacterial cells were collected via centrifugation at  $8,000 \times g$  and  $4^\circ\text{C}$  for 10 min and resuspended in sterile distilled water to obtain an  $A_{660} = 0.5$ . *S. mutans* culture aliquots ( $2\ \mu\text{L}$ ) and  $100\ \mu\text{L}$  of  $2 \times$  tryptic soy broth without dextrose (TSB) medium (Becton Dickinson and Company, San Jose, CA, USA) and supplemented with 0.5% sucrose were added to microtiter plates, followed by the addition of nattokinase or sterile distilled water to a volume of  $200\ \mu\text{L}$ . The plates were incubated at  $37^\circ\text{C}$  in a 5%  $\text{CO}_2$  atmosphere for 20 h. After incubation, the wells of microtiter plates were washed with distilled water, and adherent cells were stained with 0.1% crystal violet. The dye was solubilized in acetate, and the  $A_{590}$  was determined using a microplate reader (Colona Electric, Ibaraki, Japan). The inhibition ratio (%) is expressed as relative values, with the control set as “100”. Data are expressed as the mean  $\pm$  standard deviation of values from three independent experiments.

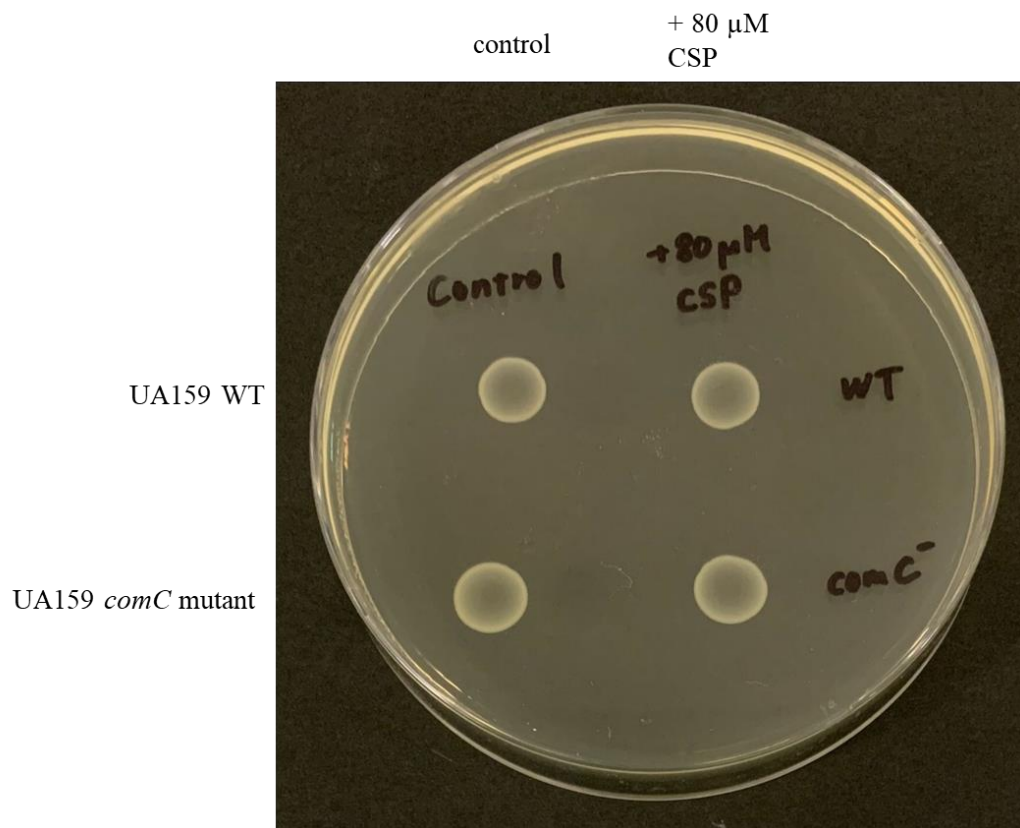

Figure S4. Spot assay conducted using agar medium with CSP addition.

CSP was prepared at a final concentration of 80  $\mu$ M and mixed with *S. mutans* UA159 WT and UA159 *comC* mutant bacterial suspensions. Thereafter, 10  $\mu$ L of the mixture was spotted on BHI agar and incubated at 37 °C in a 5% CO<sub>2</sub> atmosphere for 44 h. The growth inhibitory effect of CSP was assessed from the colonies formed.

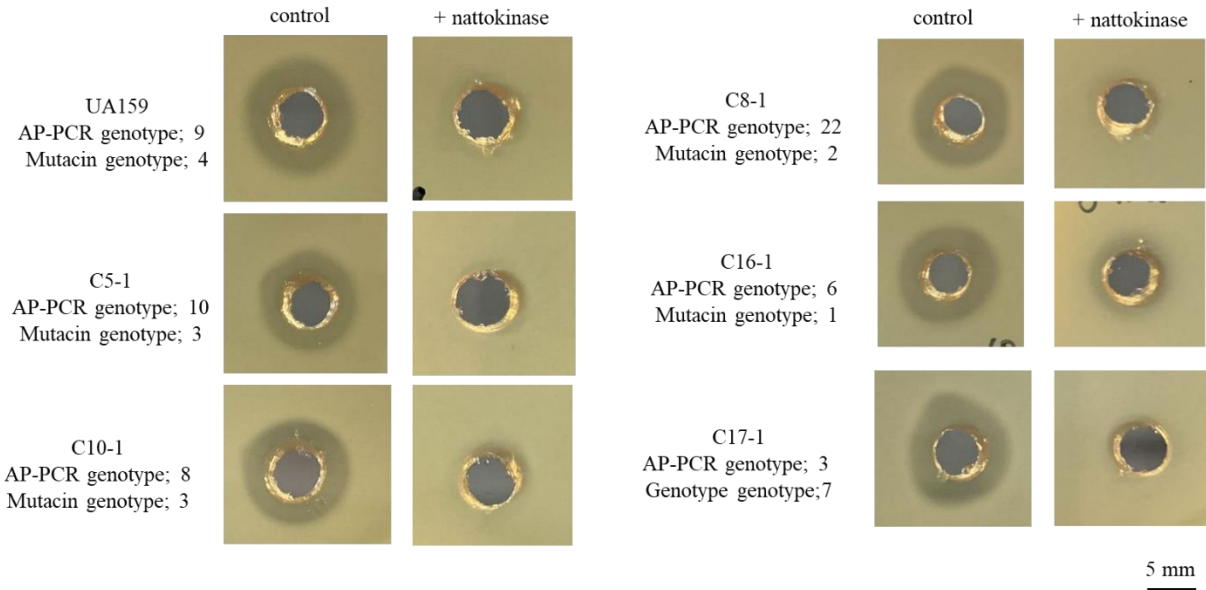

Figure S5. Effect of nattokinase on crude mutacin fraction.

A culture of *S. mutans* (300  $\mu$ L) was inoculated into 30 mL TSB medium containing 0.13% (w/v) glucose and 6% (w/v) yeast extract. The mixture was incubated at 37 °C in a 5% CO<sub>2</sub> atmosphere for 20 h. After incubation, the culture was centrifuged at 8,000  $\times g$  and 4 °C for 10 min. The supernatant was then salted at 4 °C for 3 h via ammonium sulphate precipitation at an 80% saturation. After salting, centrifugation was performed at 9,390  $\times g$  and 4 °C for 30 min, and the precipitated fraction was dissolved in 1,500  $\mu$ L of 0.1 M PBS (pH 7.4) (Fujifilm Wako Pure Chemical) to obtain a 20-fold concentration. The solution was sterilized via filtration through a 0.22  $\mu$ m filter to give a crude purified mutacin solution. BHI agar containing 1% (v/v) *S. gordonii* DL1 culture was prepared, and 5 mm diameter holes were made. Then, 50  $\mu$ L of crude purified mutacin solution was mixed with 5  $\mu$ L of 10 mg/mL nattokinase or sterile water. Next, 50  $\mu$ L of the mixture was added to the holes made in the agar. The medium was incubated at 37 °C in a 5% CO<sub>2</sub> atmosphere for 44 h. After incubation, the size of the inhibition circles formed was measured.
